# Supplementary material
Source: PubMed Central journal article supplement (PMC9169290)
Supplement: 13063_2022_6401_MOESM4_ESM.pdf [file 13063_2022_6401_MOESM4_ESM.pdf]

| ASSESSMENTVERFAHREN            |                                                        | STUDY PHASE |   |    |     |   |    |   |  |   |  |  |   |  |  |   |  |  |   |
|--------------------------------|--------------------------------------------------------|-------------|---|----|-----|---|----|---|--|---|--|--|---|--|--|---|--|--|---|
|                                |                                                        | I           |   | II | III |   | IV |   |  |   |  |  |   |  |  |   |  |  |   |
|                                | SDM-Q-9, Patient                                       |             |   |    | X   |   |    |   |  |   |  |  |   |  |  |   |  |  |   |
|                                | SDM-Q-9, informal carer                                |             |   |    | X   |   |    |   |  |   |  |  |   |  |  |   |  |  |   |
| <b>Prehabilitation</b>         | Defined goals (primary, secondary) for prehabilitation |             |   | X  |     |   |    |   |  |   |  |  |   |  |  |   |  |  |   |
|                                | Performed therapies during prehabilitation             |             |   |    |     | X |    |   |  |   |  |  |   |  |  |   |  |  |   |
|                                | Patient diary für independent exercises                |             |   |    |     | X |    |   |  |   |  |  |   |  |  |   |  |  |   |
| <b>Care dependency</b>         | Level of care dependency (NBA)                         |             | X |    |     |   |    |   |  | X |  |  |   |  |  |   |  |  | X |
|                                | Current level of care dependency                       |             | X |    |     |   |    |   |  | X |  |  |   |  |  |   |  |  | X |
|                                | Barthel Index (BI)                                     |             | X |    |     |   | X  |   |  | X |  |  |   |  |  |   |  |  | X |
| <b>Health Care Utilization</b> | Visits medical doctor / hospital                       |             |   |    |     |   |    | X |  | X |  |  | X |  |  | X |  |  | X |
|                                | LOS hospital                                           |             |   |    |     |   |    | X |  | X |  |  | X |  |  | X |  |  | X |
